# Supplementary material for: Oscillatory Coupling between Solar–Terrestrial Dynamics and El Niño–Southern Oscillation (ENSO) during Equinox Periods: An Astroclimatological Decadal Analysis
Source: Research Square preprint supplement (doi:10.21203/rs.3.rs-7110270/v1), 2025-08-04
Supplement: Supplementary file 1 [file 4822a1b4c7384d2dfe0626a9.docx]

**Oscillatory Coupling between Solar–Terrestrial Dynamics and El Niño–Southern Oscillation (ENSO) during Equinox Periods: An Astroclimatological Decadal Analysis**

Guillermo A. Chinni
Facultad de Ingeniería, Universidad del Salvador, Argentina
Email: chinni.guillermoandres@usal.edu.ar

-

**Supplementary Information
September Equinox with Official UTC Timing**

An additional evaluation was conducted by aligning the ephemerides with the precise equinox timings provided by NASA’s ModelE AR5 simulations (Goddard Institute for Space Studies, 2024). This adjustment, applied specifically to the September equinox dataset, yielded coefficient estimates closely matching those of the primary model, while improving the explanatory power as indicated by an adjusted *R*² of approximately 0.95. Detailed results are presented in the Supplementary Tables.

This refined analysis reveals a more pronounced upward trend in solar declination at the September equinox (UTC) over the 2013–2024 period. In contrast, Earth–Sun distance exhibits a mild oscillatory pattern superimposed on a subtle baseline, oscillating around a stable mean value. The sign and magnitude consistency of the principal predictors—solar declination (*δᵢ*), Earth–Sun distance (*dᵢ*), and shortwave radiation (FSWᵢ)—is maintained across both models, reinforcing the robustness of their influence on the Oceanic Niño Index (ONI).

**Multiple Linear Regression Model Based on September Equinox (UTC)**

The multiple linear regression model based on the September equinox data aligned with NASA’s official UTC timings is expressed as:

ONIᵢ = -3217.943 − 24.040·*δᵢ* + 3246.356·*dᵢ* − 0.1417·FSW*ᵢ* − 0.0075·*Xsᵢ* + 0.0103·*Ysᵢ* - 1.7881·(*Ys*/*Xs*)*ᵢ*  + *ϵ* (1 Supplementary model)

Where:

ONIᵢ: Oceanic Niño Index for observation *i* (SON)

*δᵢ*: Solar declination anomaly (degrees, signed)

*dᵢ*: Earth–Sun distance (astronomical units, au)

FSW: Net shortwave radiation flux (recurring monthly mean, W·m⁻²)

*Xsᵢ, Ysᵢ*: Polar motion components (milliarcseconds, mas)

(*Ys*/*Xs*)*ᵢ*: Polar axis coefficient (dimensionless)

*εᵢ*: the error term for observation *i*. Although the error term is not explicitly detailed here, regression diagnostics and model fit statistics provide strong evidence of the model’s validity and explanatory power.

**Summary and Limitations of the 0.95 Model**

A multiple linear regression model was developed to estimate the Niño 3.4 Index (ONI) based on astronomical and oceanic variables measured during the September equinox from 2013 to 2024. Predictor variables included solar declination, Earth–Sun distance, downwelling shortwave radiation (FSW), polar motion components (*Xₛ*, *Yₛ*), and the ratio *Yₛ/Xₛ*.

The model explains approximately 94.9% of the variance in ONI (*R*² = 0.949, adjusted *R*² = 0.887), showing overall statistical significance (*F* = 15.36, *p* = 0.00439). Among individual predictors, downwelling shortwave radiation was the most significant (*p* < 0.001), with a negative coefficient indicating that increases in radiation are associated with decreases in ONI. Solar declination showed a near-significant trend (*p* = 0.08), suggesting its role in the seasonal modulation of the index.

While other variables such as polar motion components did not reach individual significance, their inclusion improved the overall model fit, likely due to the complex interplay between astronomical and oceanic factors influencing ENSO dynamics. A high condition number indicated multicollinearity among predictors, which is common in models involving interrelated astronomical variables.

Residual analysis and normality tests did not reveal serious violations of model assumptions, supporting its validity for estimating ONI during the studied period and conditions.

However, several limitations should be noted. This model relies solely on data collected once per year at the September equinox, naturally limiting the sample size to 12 observations over the 12-year period (2013–2024). This small sample reduces statistical power and robustness, which must be considered when interpreting the results. Additionally, restricting data to a single annual time point reduces temporal variability and may limit the model's applicability outside the equinox period, unlike broader models that include both March and September equinox data.

Furthermore, the high condition number suggests multicollinearity, which can affect the stability of coefficient estimates despite the strong overall model fit. Finally, by focusing on the September equinox, the model may miss seasonal or intra-annual ENSO dynamics captured by models using broader temporal datasets.

Despite these limitations, this model serves as a valuable comparative tool, providing high explanatory power for discrete astronomical events that occur only once per year, and complements broader models by offering precise insights tied to specific temporal windows.

**Solar Declination:**

Solar declination displays a steady increasing trend during the September equinox period from 2013 to 2024, consistent with the slow astronomical precession effect. Values increase gradually from approximately 0.074° in 2013 to 0.135° in 2024.

**Earth–Sun Distance and Solar Declination:**

Solar declination steadily increases at the September equinox (UTC), consistent with axial precession, exhibiting a clear upward trend over the 2013–2024 period. In contrast, Earth–Sun distance displays a mild oscillatory pattern superimposed on a subtle upward trend, fluctuating around a nearly stable baseline of approximately 1.0035 astronomical units (au). Although these annual variations are relatively small (~18,100 km from the mean), they are sufficient to influence solar insolation patterns. Together with changes in solar declination and incoming shortwave radiation, these factors likely contribute to the ENSO variability observed during equinoctial phases.


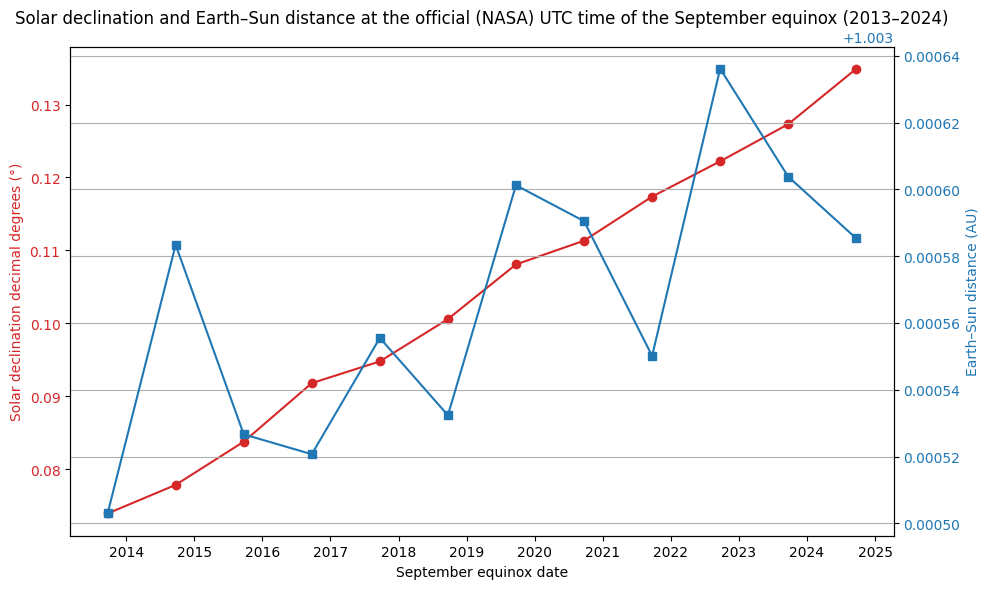


*Figure 1*. Solar declination steadily increases at the September equinox (UTC), consistent with axial precession, while Earth–Sun distance exhibits a mild oscillatory pattern superimposed on a subtle upward trend over the 2013–2024 period.

**Data Availability for Supplementary Information**

The datasets and ephemerides used in this supplementary analysis are the same as those described in the main manuscript’s Data Availability section.
